# Supplementary material for: Species Identity Dominates over Environment in Driving Bacterial Community Assembly in Wild Invasive Leaf Miners
Source: PubMed Central journal article supplement (PMC9045101; doi:10.1128/spectrum.00266-22), 2022-03-28
Supplement: spectrum00266-22_supp_1_seq12.pdf [file spectrum00266-22_supp_1_seq12.pdf]

## **Supplemental Information for:**

### **Species Identity Dominates over Environment in Driving Bacterial Community Assembly in Wild Invasive Leaf Miners**

Yu-Xi Zhu<sup>a</sup>, Ya-Wen Chang<sup>a</sup>, Tao Wen<sup>b</sup>, Run Yang<sup>a</sup>, Yu-Cheng Wang<sup>a</sup>, Xin-Yu Wang<sup>a</sup>, Ming-Xing Lu<sup>a</sup>, Yu-Zhou Du<sup>a\*</sup>

<sup>a</sup>Institute of Applied Entomology, School of Horticulture and Plant Protection, Yangzhou University, Yangzhou, Jiangsu 225009, China.

<sup>b</sup>The Key Laboratory of Plant Immunity, Jiangsu Provincial Key Lab for Organic Solid Waste Utilization, Jiangsu Collaborative Innovation Center for Solid Organic Wastes, Educational Ministry Engineering Center of Resource-saving fertilizers, Nanjing Agricultural University, Nanjing 210095, China

**\*Correspondence** to Yu-Zhou Du, E-mail: yzdu@yzu.edu.cn; Address: Institute of Applied Entomology, School of Horticulture and Plant Protection, Yangzhou University, Yangzhou, Jiangsu 225009, China.

**RUNNING TITLE:** Bacterial community assembly in *Liriomyza*

**This file includes:**

**Table S2 to S4;**

**Fig. S1 to S8.**

**Table S2** The alpha diversity of four leaf miner bacterial communities.

| Host species           | ACE      | Chao 1   | Pielou evenness | Simpson evenness | Shannon    | Richness |
|------------------------|----------|----------|-----------------|------------------|------------|----------|
| <i>L. chinensis</i>    | 569.71 ± | 526.96 ± | 0.57 ±0.18      | 0.034 ±0.022     | 3.27 ±1.36 | 316.42 ± |
|                        | 300.50   | 287.33   |                 |                  |            | 190.04   |
| <i>L. huidobrensis</i> | 426.95 ± | 406.77 ± | 0.38 ±0.22      | 0.026 ±0.016     | 2.02 ±1.37 | 181.56 ± |
|                        | 289.73   | 272.75   |                 |                  |            | 126.59   |
| <i>L. trifolii</i>     | 399.31 ± | 365.67 ± | 0.46 ±0.13      | 0.029 ±0.016     | 2.39 ±0.87 | 185.07 ± |
|                        | 288.21   | 235.58   |                 |                  |            | 101.59   |
| <i>L. sativae</i>      | 428.23 ± | 385.22 ± | 0.46 ±0.14      | 0.035 ±0.038     | 2.41 ±1.01 | 193.90 ± |
|                        | 319.59   | 271.22   |                 |                  |            | 129.73   |

**Table S3** Network features of bacterial community of laboratory and wild leaf miners.

| Topological property       | Laboratory | Wild     |
|----------------------------|------------|----------|
| Edges                      | 425        | 257      |
| Positive edges             | 344        | 257      |
| Negative edges             | 81         | 0        |
| Vertices                   | 67         | 65       |
| Connectance                | 0.192221   | 0.123558 |
| Average degree             | 12.68657   | 7.907692 |
| Average path length        | 2.435097   | 1.884861 |
| Diameter                   | 4.13294    | 3.859676 |
| Edge connectivity          | 1          | 0        |
| Clustering coefficient     | 0.716957   | 0.934223 |
| Clusters                   | 1          | 6        |
| Centralization degree      | 0.247173   | 0.079567 |
| Centralization betweenness | 0.136181   | 0.042124 |
| Centralization closeness   | 0.270383   | 0.007344 |

**Table S4** Redundancy analysis (RDA) variation.

| Factors    | Explained variation (%) | <i>F</i> | <i>p</i> |
|------------|-------------------------|----------|----------|
| Sex        | 0.23                    | 1.05     | 0.387    |
| Host plant | 1.10                    | 2.61     | 0.001    |
| Location   | 1.00                    | 2.94     | 0.001    |
| Longitude  | 2.33                    | 12.70    | 0.001    |
| AMT        | 1.90                    | 7.83     | 0.001    |
| AP         | 1.95                    | 4.98     | 0.001    |
| Species    | 1.17                    | 3.90     | 0.001    |

AP: annual mean precipitation; AMT: annual mean temperature.

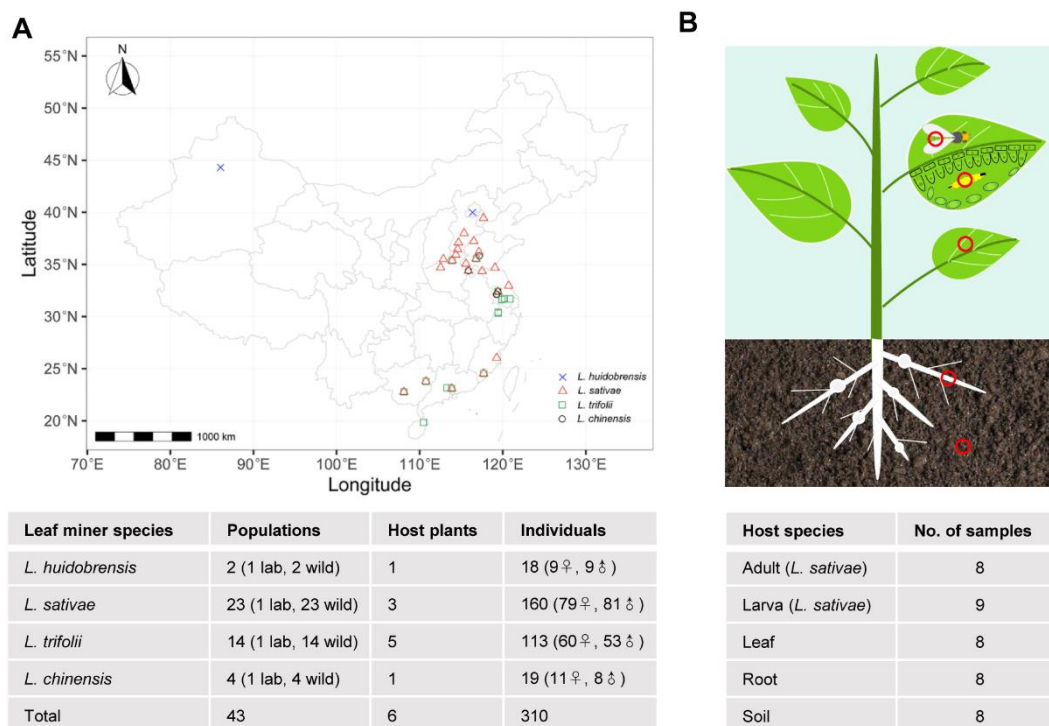

**FIG S1** Experimental design. (A) Location of sampling sites across multiple geographic regions of China. A total of 310 individual samples associated with four leaf miner species, including *L. trifolii*, *L. sativae*, *L. chinensis* and *L. huidobrensis*, were collected from 43 populations and 6 host plant species. (B) Samples from the continuum of leaf miners and their associated with leaves, roots and soil. Detailed samples information corresponded in Table S1 in the Supplemental Material.

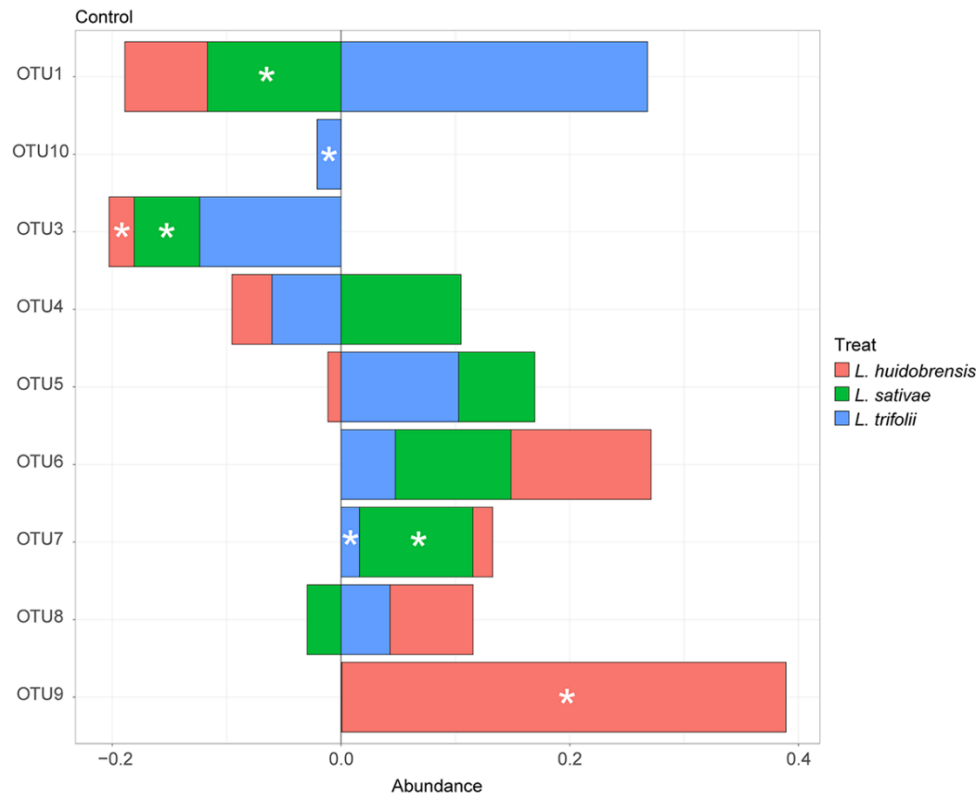

**FIG S2** The significantly different OTUs between the native leaf miner *L. chinensis* and other three invasive leaf miners. “\*” represents significant difference between each invasive leaf miner and the native leaf miner (Control) ( $p < 0.05$ ).

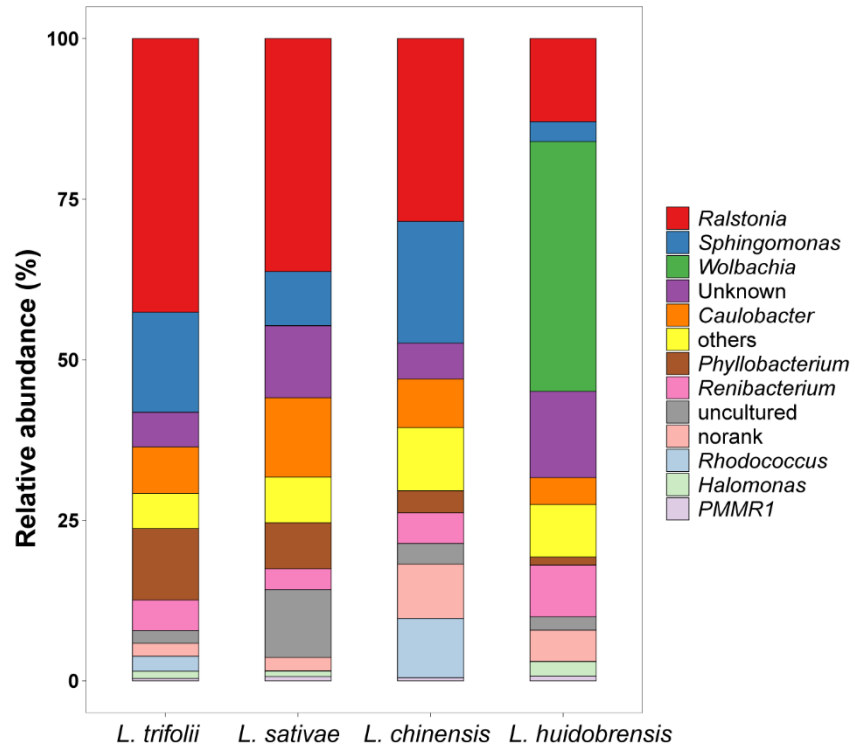

**FIG S3** Relative abundance of each bacterial genus in different leaf miner species.

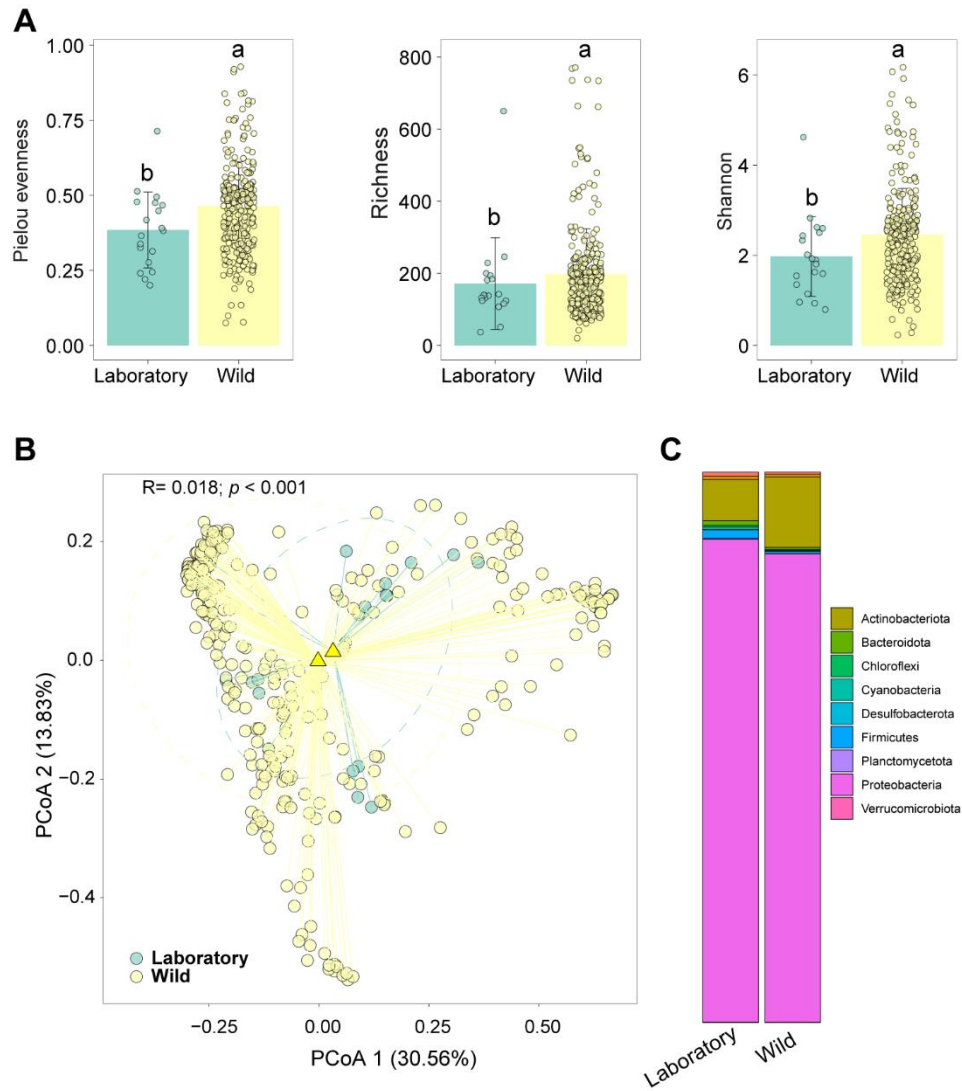

**FIG S4** Comparison between the bacterial communities in laboratory-reared and wild leaf miner. (A) The alpha diversity indices (Pielou evenness, Shannon and Richness index) of the laboratory-reared and wild leaf miner bacterial communities. Different letters indicate significant differences between groups at a level of  $p < 0.05$ . (B) Principal coordinates analysis (PCoA) of bacterial community structure between the laboratory-reared and wild leaf miner. (C) The relative abundance of each bacterial phylum in the laboratory-reared and wild leaf miner.



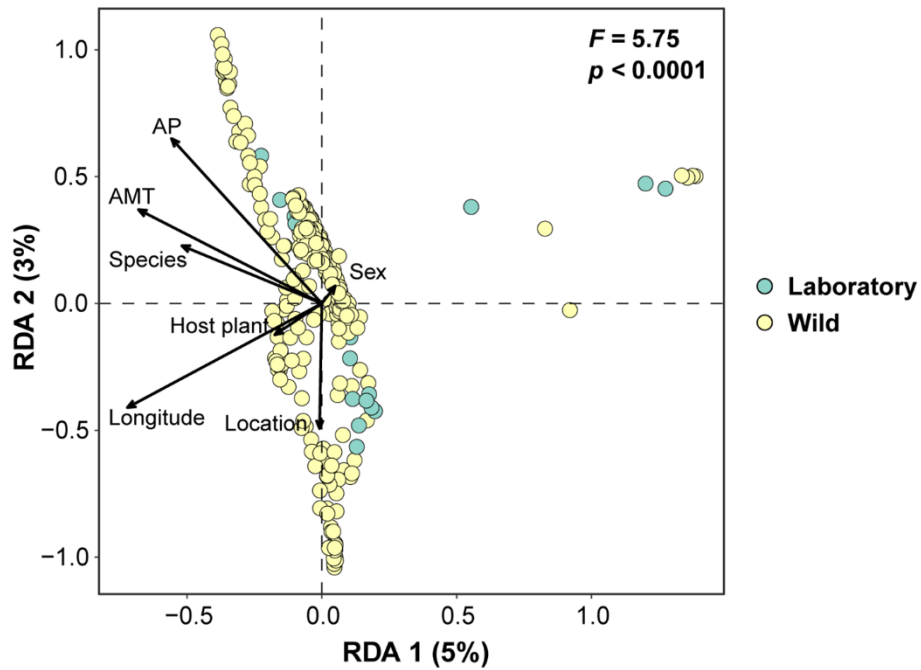

**FIG S5** Redundancy analysis (RDA) highlighting correlations between multiple environmental factors and bacterial communities. AP: annual mean precipitation; AMT: annual mean temperature.

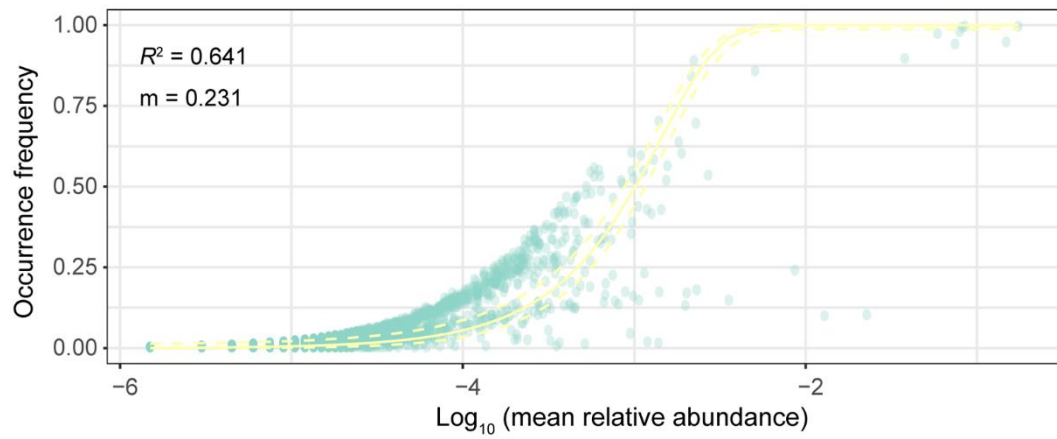

**FIG S6** Fit of the neutral for 310 leaf miner samples. The yellow solid and dashed lines represent the predicted occurrence frequency and 95% confidence interval of the neutral model, respectively.  $m$  indicates the estimated migration rate and  $R^2$  indicates the fit to the neutral model.

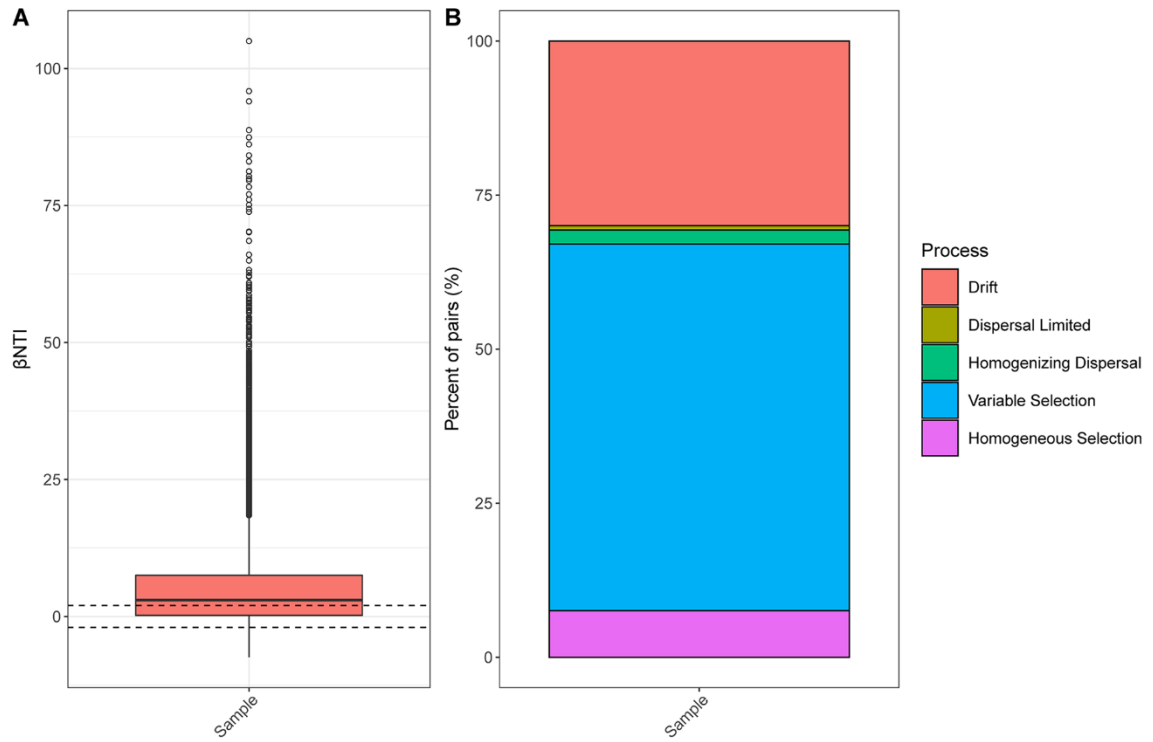

**FIG S7** Ecological processes driving the assembly of bacterial communities in all samples. (A) Effects of deterministic ( $\beta$ NTI  $\geq 2$  or  $\beta$ NTI  $\leq -2$ ) and stochastic processes ( $-2 < \beta$ NTI  $< 2$ ) in shaping bacterial community in all samples. (B) The quantified major ecological processes in governing the microbial community.

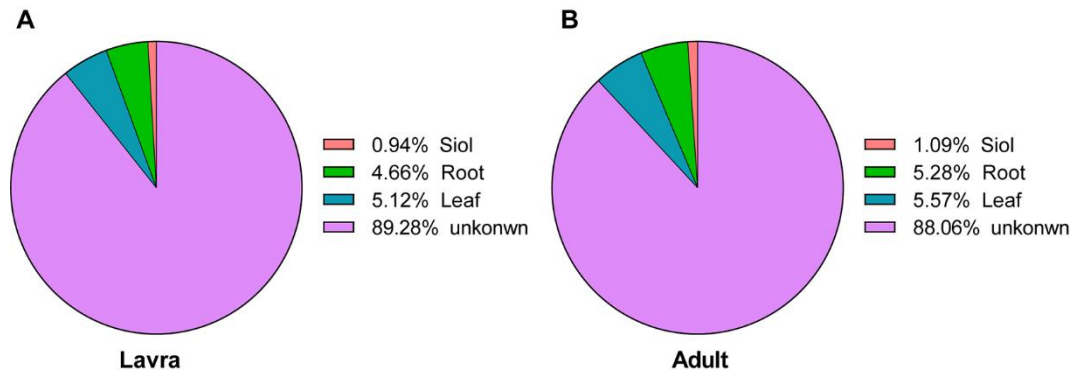

**FIG S8** Source-tracking analysis of larva (A) and adult (B) of leaf miner microbes derived from leaf, root and soil.
